# Supplementary material for: Cyclic tetra[(indolyl)-tetra methyl]-diethane-1,2-diamine (CTet) impregnated hydrous zirconium oxide as a novel hybrid material for enhanced removal of fluoride from water samples
Source: Royal Society of Chemistry journal article supplement (doi:10.1039/c5ra01845e), 2015-01-01
Supplement: c5ra01845e1.pdf [file c5ra01845e1.pdf]

Supplementary Information

**Cyclic Tetra [(Indolyl)-tetramethyl]-diethane-1,2-diamine (CTet)  
Impregnated Hydrous Zirconium Oxide as a Novel Hybrid Material for  
Enhanced Removal of Fluoride from Water.**

**Nafisur Rahman\*, Uzma Haseen and Mohammad Fazeel Khan**

\* Corresponding author: Department of Chemistry, Aligarh Muslim University, Aligarh,  
India 202 002 Tel.:+91-9412501208,  
Email id: nafisurrahman05@gmail.com

This file includes the Supplementary information of CTet-HZO Reaction mechanism. Figure  
S1 to Figure S8, Table S1 , S2 and Scheme S1.

Step I:

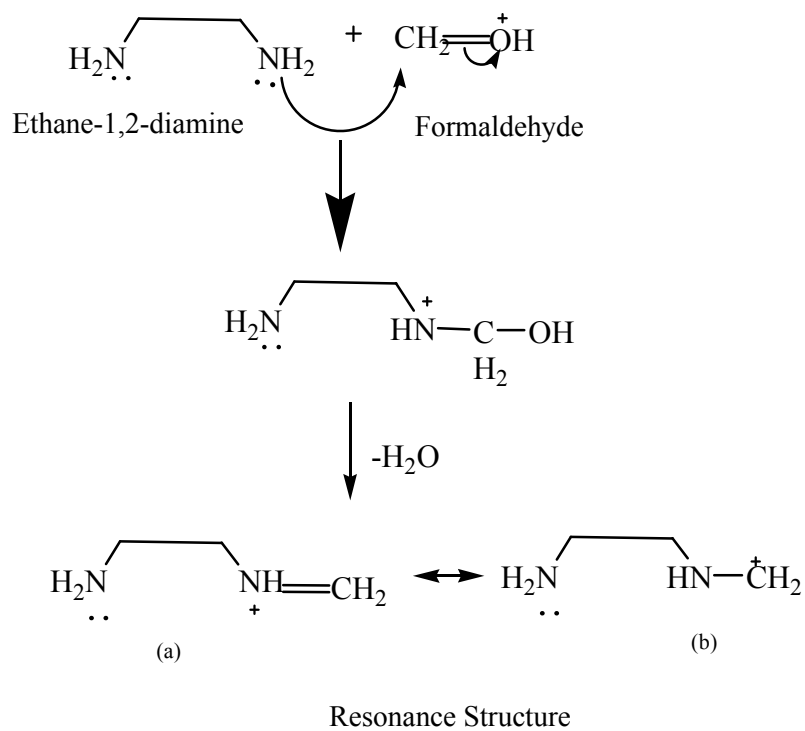

Step II :

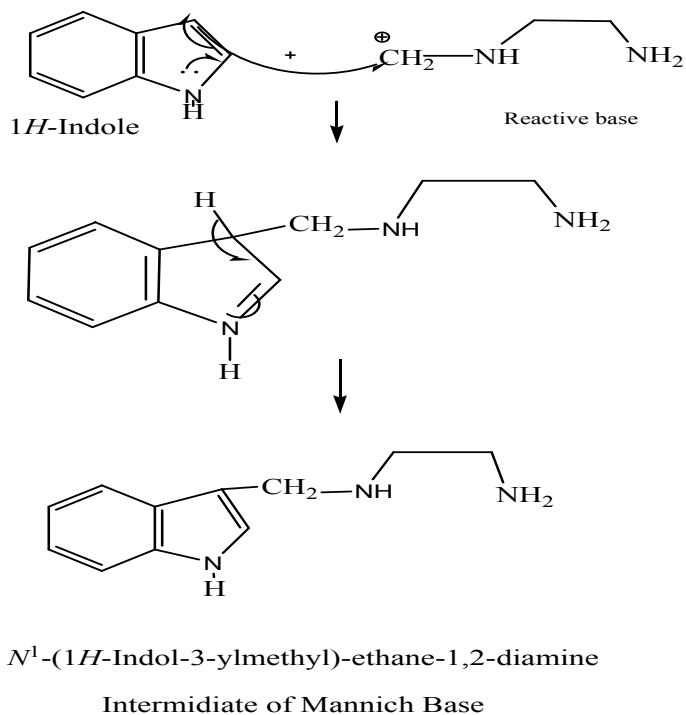

Step III:

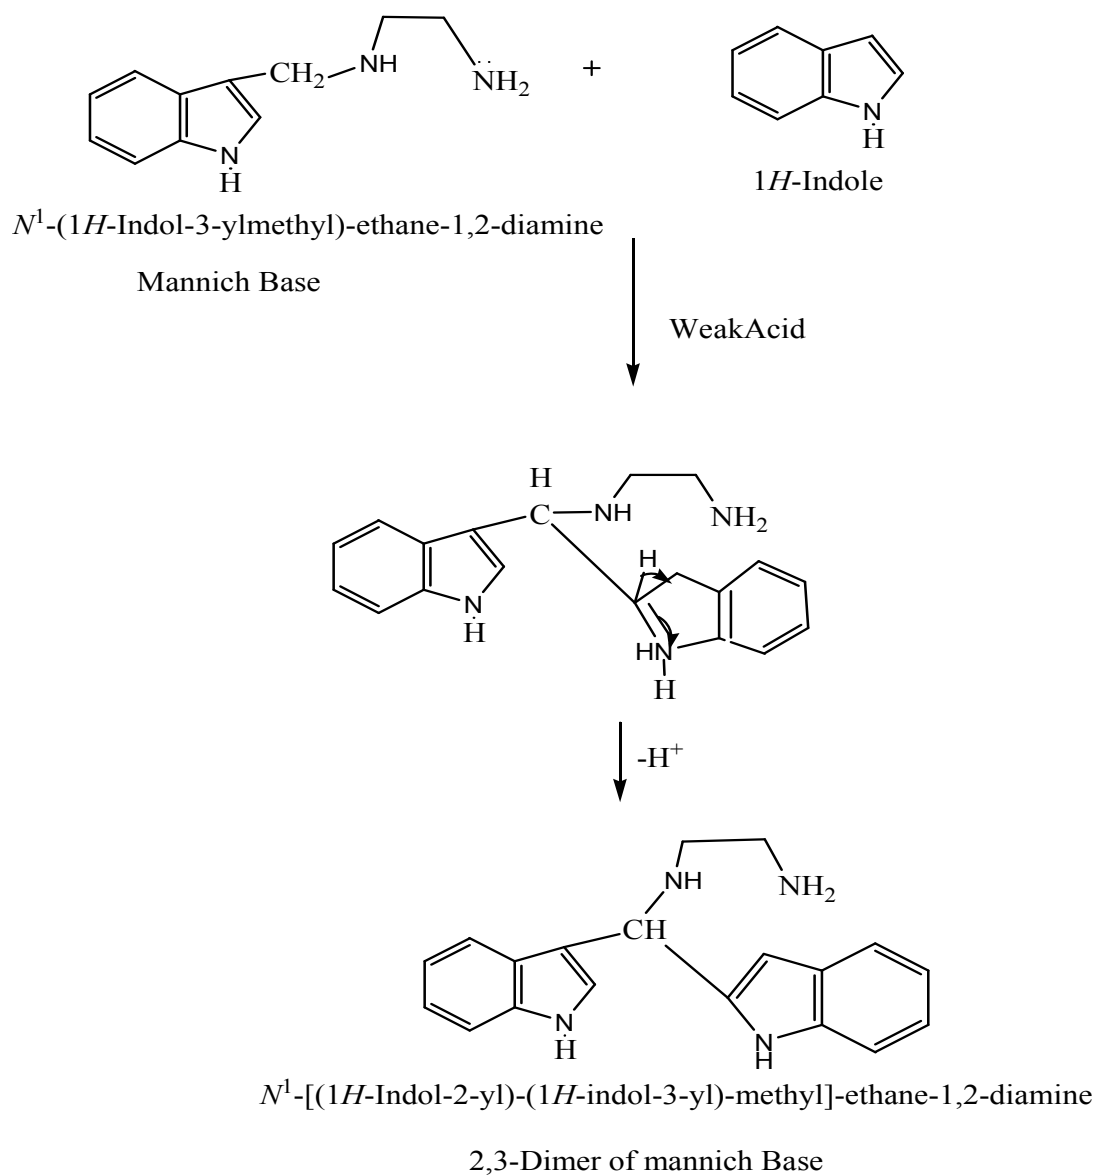

StepIV:

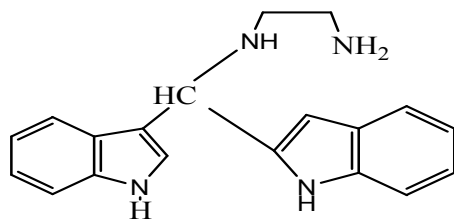

*N*<sup>1</sup>-[(1*H*-Indol-2-yl)-(1*H*-indol-3-yl)-methyl]-ethane-1,2-diamine

(2,3- Dimer of mannich Base)

↓ HCHO (Acetic Acid)  
Reflux for 2 hrs

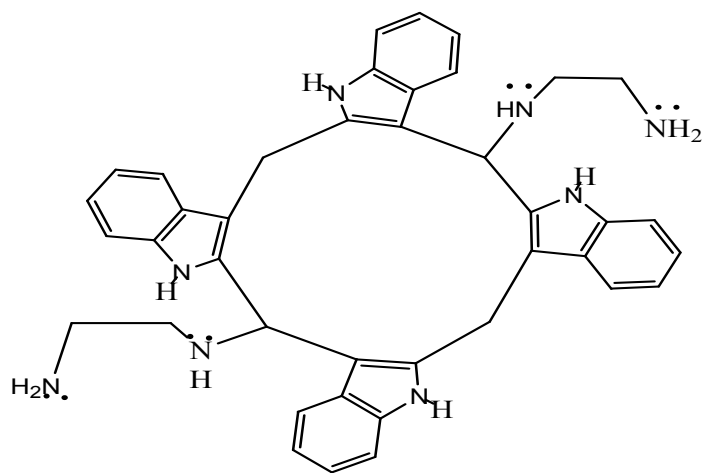

Cyclic tetra [ ( indolyl)-tetramethyl]-diethane-1,2-diamine

Cyclic Tetramer (CTet)

(CTet-HZO)

**Scheme S1: Reaction mechanism of CTet-HZO hybrid material.**

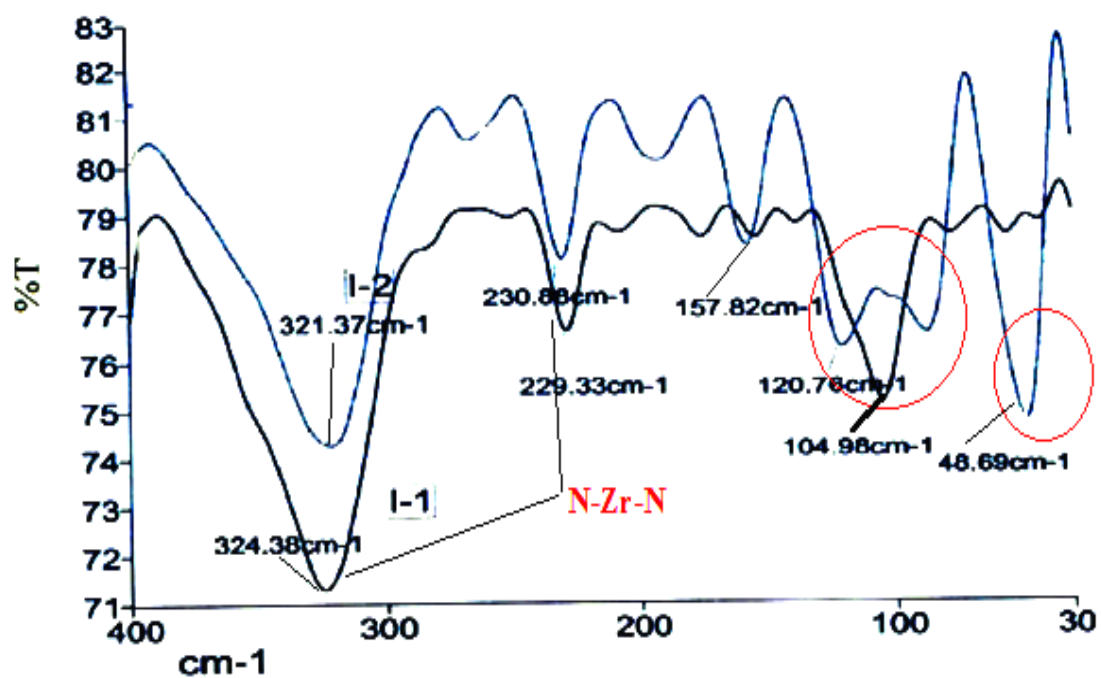

Figure S1: Far IR spectra of CTet-HZO in  $\text{Cl}^-$  form (I-1) and fluoride sorbed CTet-HZO (I-2).

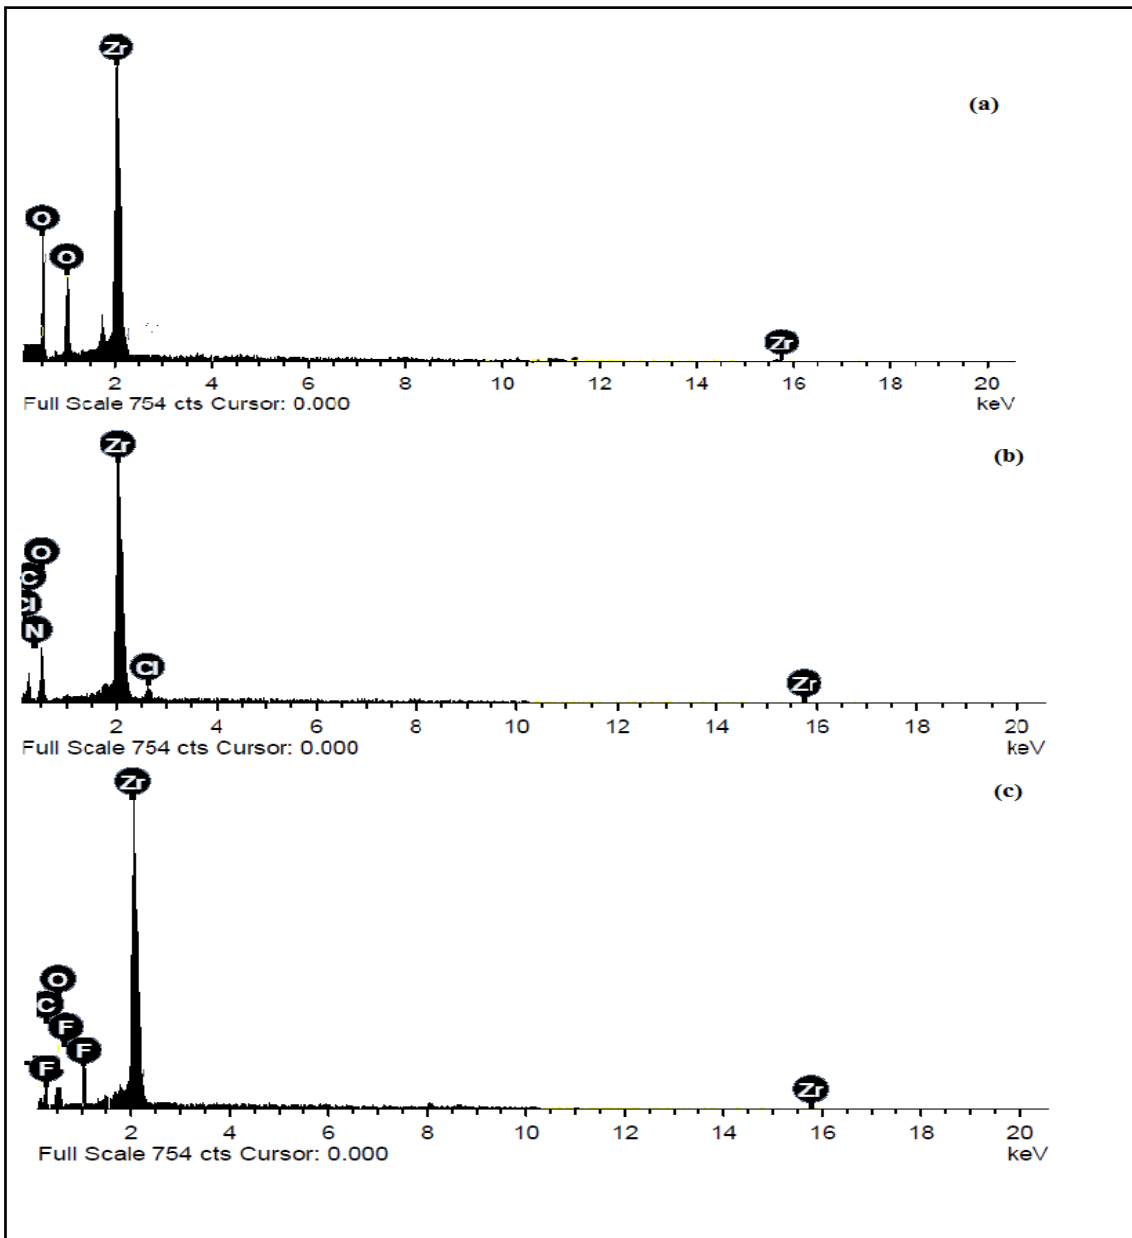

Figure S2. EDX spectra of (a) hydrous zirconium oxide (b) CTet-HZO and (c) Fluoride sorbed CTet-HZO.

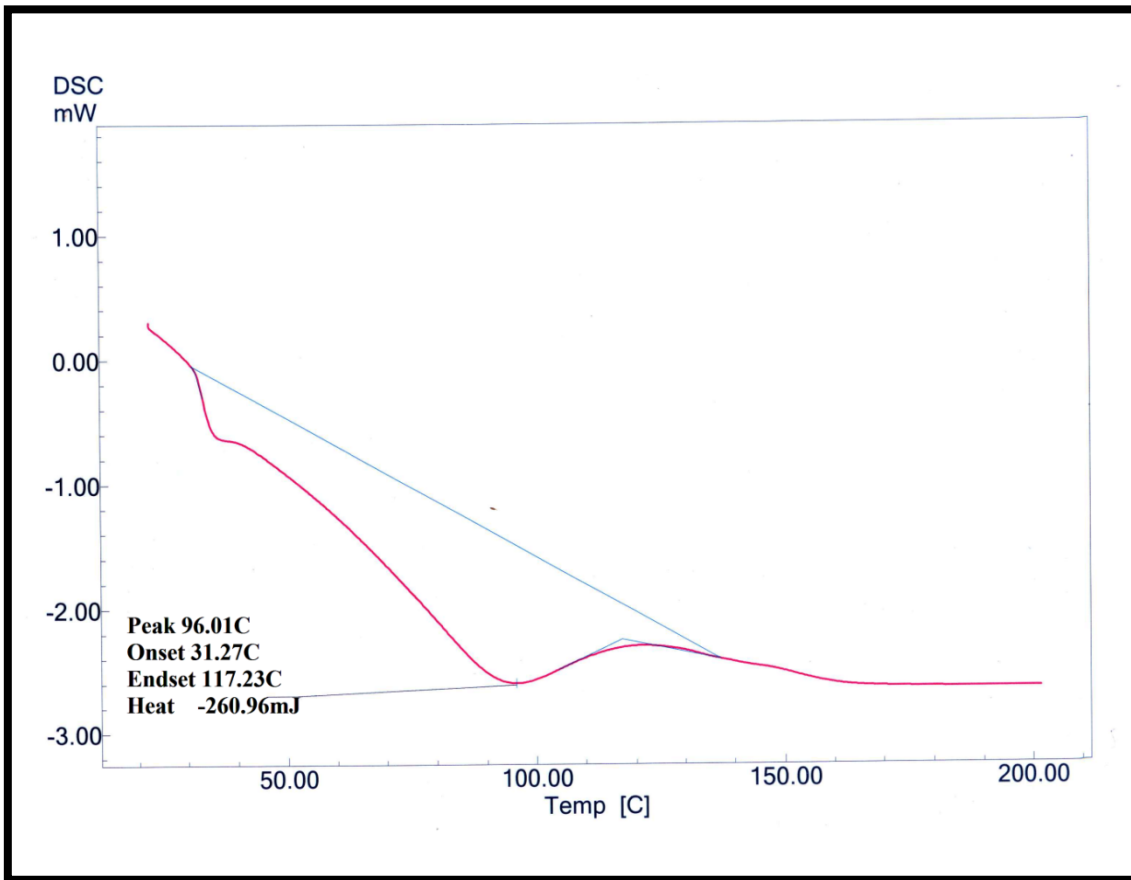

Figure S3. Differential thermal scanning (DSC) curve for CTet-HZO material.

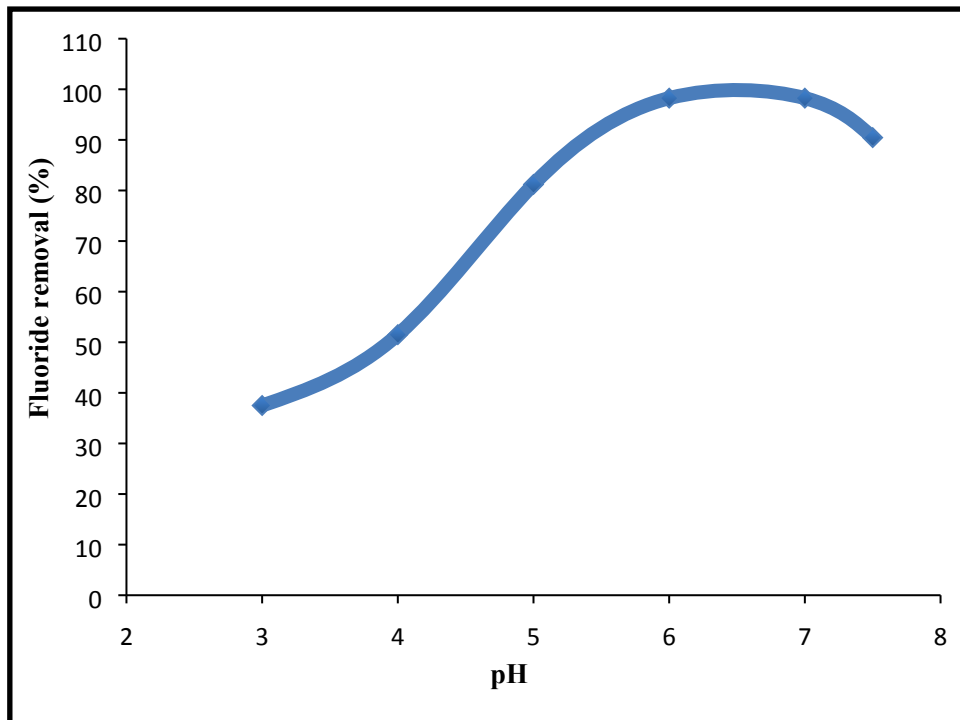

Figure S4. Effect of pH on the removal of fluoride using HZO.



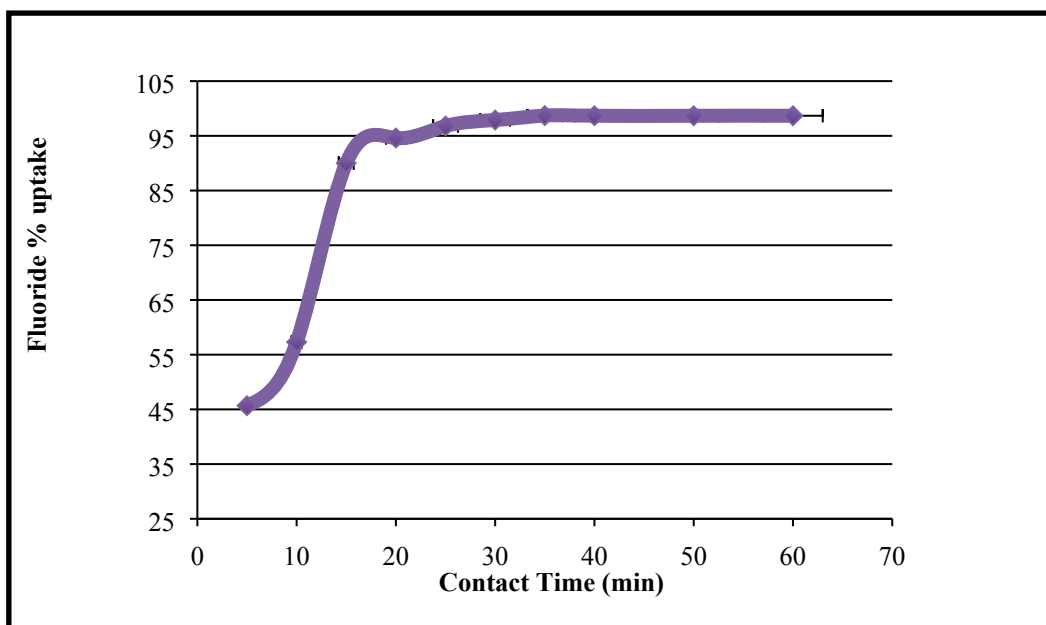

Figure S5. Effect of contact time on the % uptake of fluoride using CTet-HZO. (Concentration  $20 \text{ mgL}^{-1}$ ; pH 3.5; adsorbent dose 0.15g).

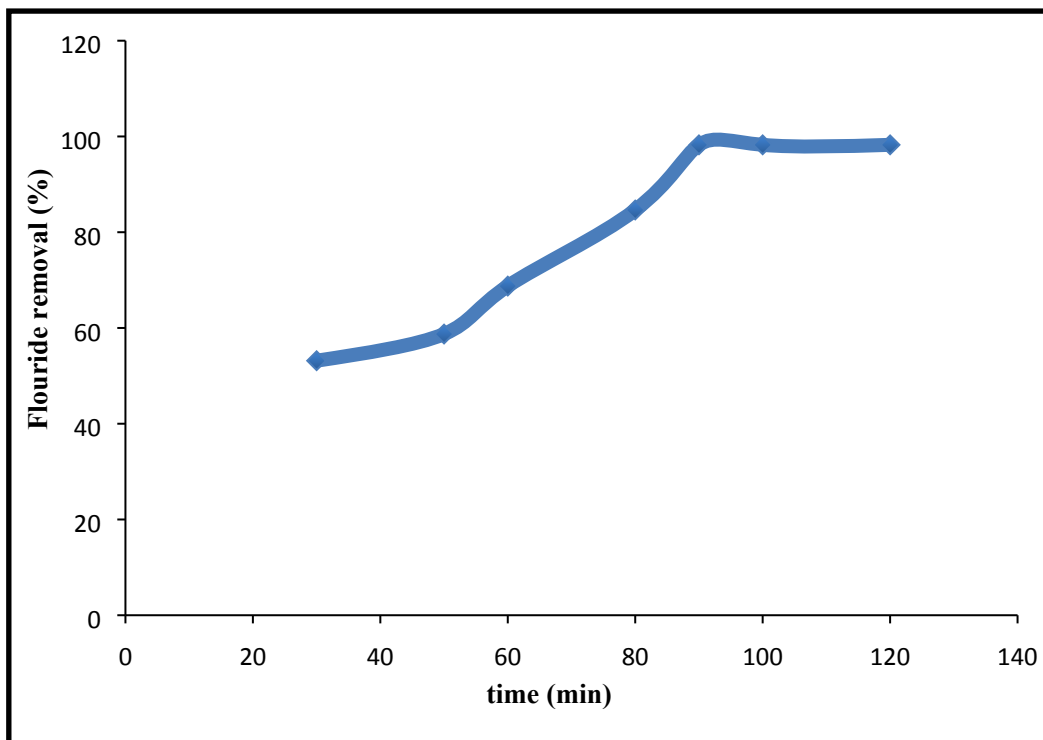

Figure S6. Effect of contact time for removal of fluoride using HZO.

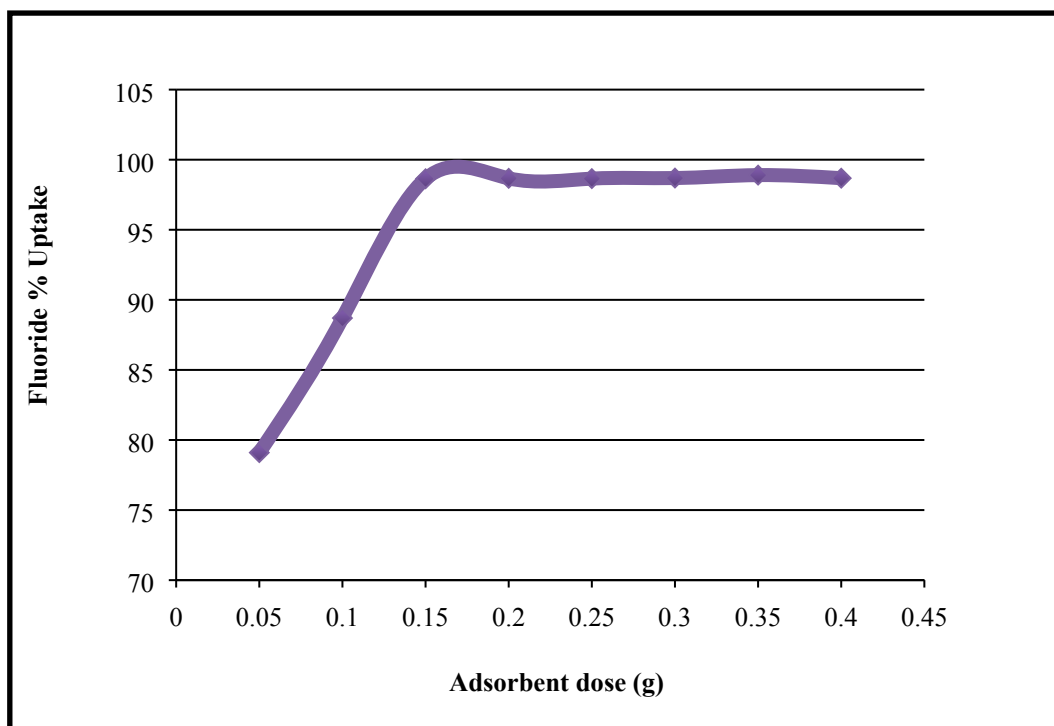

Figure S7. Effect of adsorbent dose on the fluoride uptake using CTet-HZO. (Conc.; 20 mg/L, Temp.; 308 K, pH 3.5).

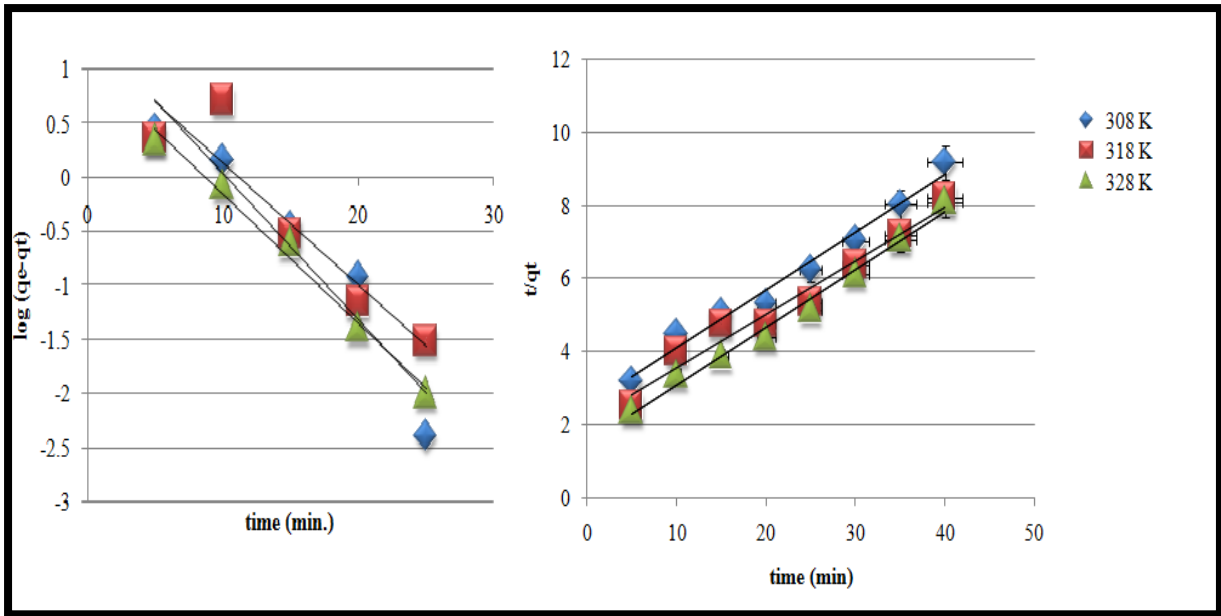

(a)

(b)

Figure S8. Kinetic plots. (a) Pseudo first order kinetic model (b) pseudo second order kinetic model.

**Table S1: Characteristics of Water samples.**

| <b>Parameters</b>                                            | <b>Values</b> |
|--------------------------------------------------------------|---------------|
| <b>Total hardness as CaCO<sub>3</sub> (mgL<sup>-1</sup>)</b> | 123-415       |
| <b>Total alkalinity</b>                                      | 245-548       |
| <b>F<sup>-</sup></b>                                         | 1.84-3.62     |
| <b>Cl<sup>-</sup> (mg/L)</b>                                 | 55-260        |
| <b>NO<sub>3</sub><sup>-</sup> (mg/L)</b>                     | 10-120        |
| <b>SO<sub>4</sub><sup>2-</sup> (mg/L)</b>                    | <180          |
| <b>Na<sup>+</sup> (mg/L)</b>                                 | 28.9-37.4     |
| <b>K<sup>+</sup> (mg/L)</b>                                  | 1.6-24.8      |
| <b>Total iron as Fe (mg/L)</b>                               | <0.09         |
| <b>Turbidity</b>                                             | 1.2-4.6       |
| <b>pH</b>                                                    | 6.5-8.2       |
| <b>Conductivity</b>                                          | 510-2110      |

**Table S2. Basic composition of fluoride containing groundwater (GW-3) and acidic effluent from metal finishing industry.**

| Species (mg L <sup>-1</sup> )                  | Groundwater | Acidic effluent |
|------------------------------------------------|-------------|-----------------|
| F <sup>-</sup>                                 | 3.6         | 4.2             |
| Cl <sup>-</sup>                                | 80.1        | 72.1            |
| SO <sub>4</sub> <sup>2-</sup>                  | 64.4        | 56.2            |
| Alkalinity (as HCO <sub>3</sub> <sup>-</sup> ) | 158.2       | 0               |
| NO <sub>3</sub> <sup>-</sup>                   | 21.0        | 15.4            |
| Total P                                        | 0.04        | <0.06           |
| Na <sup>+</sup>                                | 210         | 108             |
| K <sup>+</sup>                                 | 7.2         | 2.08            |
| Total Hardness (as CaCO <sub>3</sub> )         | 350         | 298             |
| pH                                             | 6.8         | 4.1             |
